# Supplementary material
Source: PubMed Central journal article supplement (PMC4150392)
Supplement: NIHMS617250-supplement-01.pdf [file NIHMS617250-supplement-01.pdf]

Figure S1, related to main Figure 1 and main Table1

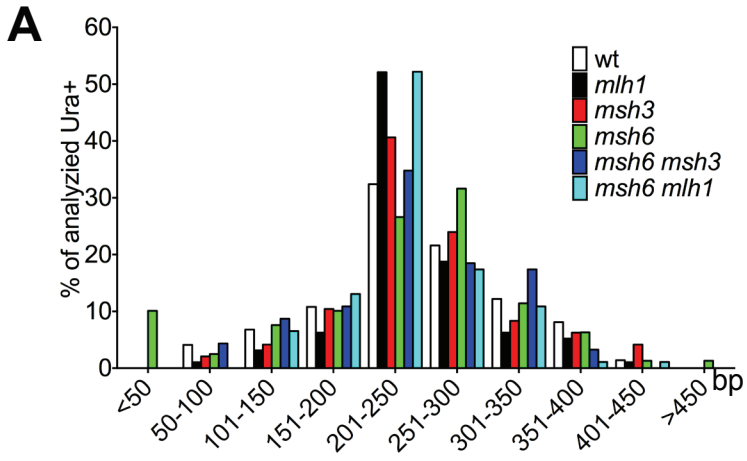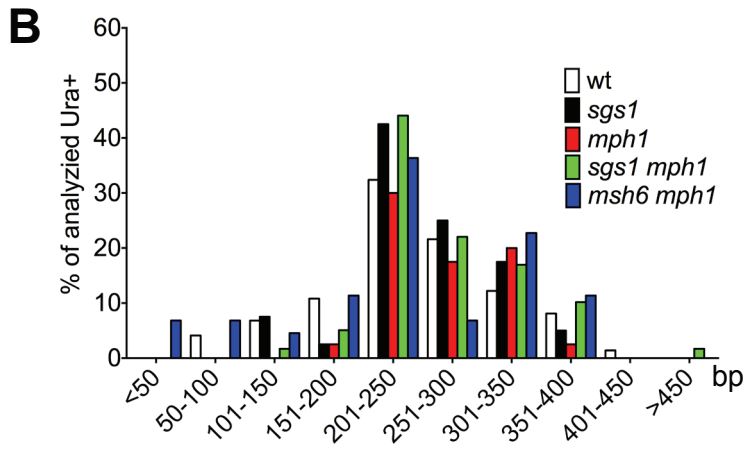

**Figure S2, related to main Figure 4**

(1) ATGTCCACAAAATCATATACCAGTAGAGCTGAGACTCATGCAAGTCCGGTTGCATCGAACTTTTACGTTTAATGGATGAAAAGAAGACCAATTTGTGTG

(101) CTTCTCTTGACGTTTCGTTGACTGATGAGCTATTGAAACTTGTGAAACGTTGGGTCCATACATTTGCCTTTTGAAAACACACGTTGATATCTTGGATGA

(201) TTTTCAGTTATGAGGGTACTGTCGTTCCATTGAAAGCATTGGCAGAGAAATACAAGTTCCTTGATATTTGAGGACAGAAAATTCGCCGATATC**GGTAA**TACA

(301) GTCAAATTGCAGTACTCTGCGGGTGTATACAGAATAGCAGAATGGTCTGATATCACCAACGCCACGGGGTTACTGGTGCTGGTATTGTTAGCGGTTTGA

(401) AGCAGGCGGCGGAAGAAGTAACAAAGGAACCTAGAGGCCTTTTGATGTTAGCAGAAATGTCATGCAAGGGCTCCCTAGCTACTGCGAGAATATACTAAGGG

(501) TACTGTTGACATTGCGAAGAGCGACAAAGATTTTGTATTCGGCTTTATTGCTCAAAGAGACATGGGTGGAAGAGATGAAGGTTAC**GATTGG**CTAATCATG

(601) ACCCCA**GGTGT**GGGTTTAGATGACAAGGGAGAC**GCATTGGGTCA**GCAGTACAGAACCGTCGACGAAGTTGTAAGTGGTGGATCAGATATCATCATTTGTTG

(701) GCAGAGGACTTTTCGCCAAGGGTAGAGATCCTAAGGTTGAAGGTGAAAGATACAGAAATGCTGGATGGGAAGCGTACCAAAAGAGAATCAGCGCTCCCA

(801) TTAA

**Figure S3, related to main Figure 4**

(1) ATGTCCACAAAATCATATACCAGTAGAGCTGAGACTCATGCAAGTCCGGTTGCATCGAACTTTTACGTTTAATGGATGAAAAGAAGACCAATTTGTGTG

(101) CTTCTCTTGACGTTTCGTTGACTGATGAGCTATTGAAACTTGTGAAACGTTGGGTCCATACATTTGCCTTTTGAAAACACACGTTGATATCTTGGATGA

(201) TTTTCAGTTATGAGGGTACTGTCGTTCCATTGAAAGCATTGGCAGAGAAATACAAGTTCTTGATATTTGAGGACAGAAAATTCGCCGATATCGGTAACACA

(301) **GTCAAATT**GCAGTACTCTGCGGGTGTATACAGAATA**GCAGAATGG**TCTGATATCACCAACGCCACGGGGTTACTGGTGCT**GGTATTGTT**AGCGGTTTGA

(401) AGCAGGCGGCGGAAGAAGTAACAAAGGAACCTAGAGGCCTTTTGATGTTAGCAGAAATGTCATGCAAGGGCTCCCTAGCTACTCGAGAATATACTAAGGG

(501) TACTGTTGACATTGCGAAGAGCGACAAAGATTTTGTATTCGGCTTTATTGCTCAAAGAGAC**ATGGG**AGGAAGAGAAGAAGGGTTTGATTGGCTAATCATG

(601) ACCCCAGGTGTAGGTTTAGACGACAAAGGCGATGCATTGGGTGAGCAGTACAGAACCGTCGACGAAGTTGTAAGTGGTGGATCAGATATCATCATTTGTTG

(701) GCAGAGGACTTTTCGCCAAGGGTAGAGATCCTAAGGTTGAAGGTGAAAGATACAGAAATGCTGGATGGGAAGCGTACCAAAGAGAATCAGCGCTCCCCA

(801) TTAA

### Supplemental Figure Legend.

Figure S1, related to main Figure 1 and main Table 1. Length of sequences copied from the ectopic *ura3-52* donor

**A.** Lack of effect on the length of the copied ectopic *Sc-ura3-52* donor when several mismatch repair genes are deleted. **B.** Minor effect of deleting the 3' to 5' helicases Sgs1 and Mph1 on the length of copied sequences. Minimums of 48 sequences were analyzed for each genotype.

Figure S2, related to main Figure 4. Example of chimeric *mat::Kl-Sc-Kl-Sc-Kl-URA3* gene from *msh6* Ura<sup>+</sup> colony with a multiple patches of *Sc-ura3-52* embedded in *mat::Kl-ura3* as a result of short-patch MMR. Red letters represent *Kl-ura3*, blue letters represent *Sc-ura3*, and the strike-through sequence represents  $\Delta 32$ ; sequences highlighted in grey represent shared microhomology.

Figure S3, related to main Figure 4. Example of chimeric *mat::Kl-Sc-Kl-Sc-Kl-URA3* gene from *msh6* Ura<sup>+</sup> colony with a multiple patches of *Sc-ura3-52* embedded in *mat::Kl-ura3* as a result of multiple ICTS. Red letters represent *Kl-ura3*, blue letters represent *Sc-ura3*, and the strike-through sequence represents  $\Delta 32$ ; sequences highlighted in grey represent shared microhomology.

Table S2, related to main Figure 2 and Figure 5. Rates of template switching in different strains

| Strain | Description                                                                                 | Rate                 | SEM                      |
|--------|---------------------------------------------------------------------------------------------|----------------------|--------------------------|
| TOY79  | <i>intrachromosomal</i><br><i>homeologous</i>                                               | $1.0 \times 10^{-6}$ | $\pm 0.7 \times 10^{-6}$ |
| TOY47  | <i>interchromosomal</i><br><i>homologous</i>                                                | $3.0 \times 10^{-3}$ | $\pm 0.1 \times 10^{-3}$ |
| TOY74  | <i>intrachromosomal</i><br><i>homologous</i>                                                | $8.0 \times 10^{-3}$ | $\pm 1.0 \times 10^{-8}$ |
| TOY62  | <i>rdh54</i> $\Delta$                                                                       | $3.3 \times 10^{-9}$ | $\pm 0.8 \times 10^{-9}$ |
| TOY83  | <i>rdh54</i> $\Delta$ <i>intrachromosomal</i><br><i>homeologous</i>                         | $5.0 \times 10^{-8}$ | $\pm 0.2 \times 10^{-8}$ |
| TOY64  | <i>rdh54</i> $\Delta$ <i>interchromosomal</i><br><i>homologous</i>                          | $3.4 \times 10^{-4}$ | $\pm 0.5 \times 10^{-4}$ |
| TOY77  | <i>rdh54</i> $\Delta$ <i>intrachromosomal</i><br><i>homologous</i>                          | $3.0 \times 10^{-3}$ | $\pm 0.1 \times 10^{-3}$ |
| TOY89  | <i>uls1</i> $\Delta$                                                                        | $1.3 \times 10^{-7}$ | $\pm 0.3 \times 10^{-7}$ |
| TOY88  | <i>dmc1</i> $\Delta$                                                                        | $2.2 \times 10^{-7}$ | $\pm 0.2 \times 10^{-7}$ |
| TOY85  | <i>rad59</i> $\Delta$                                                                       | $2.6 \times 10^{-8}$ | $\pm 0.7 \times 10^{-8}$ |
| TOY90  | <i>rad59</i> $\Delta$ <i>interchromosomal</i><br><i>homologous</i>                          | $3.7 \times 10^{-4}$ | $\pm 0.1 \times 10^{-4}$ |
| TOY91  | <i>rad59</i> $\Delta$ <i>rdh54</i> $\Delta$<br><i>interchromosomal</i><br><i>homologous</i> | $1.2 \times 10^{-4}$ | $\pm 0.1 \times 10^{-4}$ |
| TOY62  | <i>rdh54</i> $\Delta$ [ <i>CEN-RDH54</i> ]                                                  | $9.0 \times 10^{-8}$ | $\pm 2.1 \times 10^{-8}$ |
| TOY62  | <i>rdh54</i> $\Delta$ [ <i>CEN-rdh54-<math>\Delta</math>75</i> ]                            | $1.3 \times 10^{-9}$ | $\pm 1.2 \times 10^{-9}$ |
| TOY62  | <i>rdh54</i> $\Delta$ [ <i>CEN-rdh54-K352R</i> ]                                            | $1.5 \times 10^{-9}$ | $\pm 1.1 \times 10^{-9}$ |
| TOY62  | <i>rdh54</i> $\Delta$ [ <i>pGAL-RAD51</i> ]                                                 | $1.3 \times 10^{-9}$ | $\pm 0.9 \times 10^{-9}$ |
| TOY43  | wt [ <i>PGK-RAD51</i> ]                                                                     | $1.9 \times 10^{-7}$ | $\pm 0.5 \times 10^{-7}$ |
| TOY43  | wt [ <i>YEp13-RDH54</i> ]                                                                   | $1.6 \times 10^{-7}$ | $\pm 0.2 \times 10^{-7}$ |

Table S3, related to main Figure 2 and Figure 5. Spontaneous recombination in different strains

| Strain | Relevant genotype                                                                                  | Recombination frequency $\pm$ SEM, $\times 10^{-7}$ |
|--------|----------------------------------------------------------------------------------------------------|-----------------------------------------------------|
| TOY47  | wild type <i>ura3-52<math>\Delta</math>::Kl-ura3-KANMX</i>                                         | 2.8 $\pm$ 1.1                                       |
| TOY49  | <i>msh6<math>\Delta</math> ura3-52</i>                                                             | 0.0007 $\pm$ 0.0001                                 |
| TOY61  | <i>msh6<math>\Delta</math> ura3-52<math>\Delta</math>::Kl-ura3-KANMX</i>                           | 4.3 $\pm$ 1.4                                       |
| TOY64  | <i>rdh54<math>\Delta</math> ura3-52<math>\Delta</math>::Kl-ura3-KANMX</i>                          | 3.4 $\pm$ 0.9                                       |
| TOY90  | <i>rad59<math>\Delta</math> ura3-52<math>\Delta</math>::Kl-ura3-KANMX</i>                          | 0.9 $\pm$ 0.5                                       |
| TOY91  | <i>rad59<math>\Delta</math> rdh54<math>\Delta</math> ura3-52<math>\Delta</math>::Kl-ura3-KANMX</i> | 0.9 $\pm$ 0.2                                       |

\*Recombination was measured as Ura<sup>+</sup> frequency in a corresponding strain switched to *MATa*-like, i.e. recombination is measured between *Kl-ura3* on chromosome 5 and either *mat::Kl-ura3- $\Delta$ 32* or *hmr::Kl-ura3- $\Delta$ 32* both lacking HO cut site (see Experimental Procedures).

Table S4, related to Table 1, Figure 2 and Figure 5. Relative survival after DSB induction in different strains

| Strain | Description                                   | Average survival compared to wild type, % |
|--------|-----------------------------------------------|-------------------------------------------|
| TOY43  | wt *                                          | na                                        |
| TOY46  | <i>sgs1</i> Δ                                 | 98.4 ± 6.9                                |
| TOY45  | <i>mph1</i> Δ                                 | 90.6 ± 4.3                                |
| TOY60  | <i>sgs1</i> Δ <i>mph1</i> Δ                   | 83.4 ± 2.7                                |
| TOY52  | <i>mlh1</i> Δ                                 | 58.8 ± 5.5                                |
| TOY49  | <i>msh3</i> Δ                                 | 100 ± 4.9                                 |
| TOY44  | <i>msh6</i> Δ                                 | 100 ± 4.3                                 |
| TOY57  | <i>msh6</i> Δ <i>msh3</i> Δ                   | 73.0 ± 9.0                                |
| TOY58  | <i>msh6</i> Δ <i>mlh1</i> Δ                   | 110 ± 15.6                                |
| TOY72  | <i>rad1</i> Δ                                 | 50.9 ± 3.7                                |
| TOY84  | <i>msh6</i> Δ <i>mph1</i> Δ                   | 100 ± 17.8                                |
| TOY86  | <i>msh6</i> Δ <i>rad1</i> Δ                   | 31.0 ± 4.4                                |
| TOY67  | <i>rad54</i> Δ                                | 0                                         |
| TOY62  | <i>rdh54</i> Δ                                | 100 ± 5.8                                 |
| TOY85  | <i>rad59</i> Δ                                | 29.5 ± 2.2                                |
| TOY43  | wt [ <i>PGK-RAD51</i> ]                       | 82.9 ± 8.0                                |
| TOY62  | <i>rdh54</i> Δ [ <i>pGAL-RAD51</i> ]          | 47.0 ± 0.8                                |
| TOY89  | <i>uls1</i> Δ                                 | 100 ± 2.8                                 |
| TOY88  | <i>dmc1</i> Δ                                 | 97.4 ± 3.1                                |
| TOY43  | wt [YE <sub>p</sub> 13]                       | 91.3 ± 1.8                                |
| TOY43  | wt [YE <sub>p</sub> 13- <i>pRDH54-RDH54</i> ] | 45.6 ± 0.7                                |

\* survival of wt strain is 92% ± 5.4%

Table S5, related to Experimental Procedures. Yeast strains used in this study

| Strain | Genotype                                                                      | Reference   |
|--------|-------------------------------------------------------------------------------|-------------|
| JKM153 | <i>hoΔ hml::ADE1 MATα HMRa ade1 leu2 lys5 trp1::hisG ura3-52 ade3::Gal-HO</i> | Hicks, 2010 |
| TOY19  | <i>hmra::Kl-ura3-Δ32</i>                                                      | This study  |
| TOY43  | <i>hmra::Kl-ura3-Δ32 sir3Δ::HPHMX</i>                                         | This study  |
| TOY44  | <i>hmra::Kl-ura3-Δ32 msh6Δ::KANMX6 sir3Δ::HPHMX</i>                           | This study  |
| TOY45  | <i>hmra::Kl-ura3-Δ32 mph1Δ::KANMX6 sir3Δ::HPHMX</i>                           | This study  |
| TOY46  | <i>hmra::Kl-ura3-Δ32 sgs1Δ::KANMX6 sir3Δ::HPHMX</i>                           | This study  |
| TOY47  | <i>hmra::Kl-ura3-Δ32 ura3-52Δ::Kl-ura3-KANMX6 sir3Δ::HPHMX</i>                | This study  |
| TOY49  | <i>hmra::Kl-ura3-Δ32 msh3Δ::KANMX6 sir3Δ::HPHMX</i>                           | This study  |
| TOY52  | <i>hmra::Kl-ura3-Δ32 mlh1Δ::KANMX6 sir3Δ::HPHMX</i>                           | This study  |
| TOY57  | <i>hmra::Kl-ura3-Δ32 msh6Δ::KANMX6 msh3Δ::TRP1 sir3Δ::HPHMX</i>               | This study  |
| TOY58  | <i>hmra::Kl-ura3-Δ32 msh6Δ::KANMX6 mlh13Δ::TRP1 sir3Δ::HPHMX</i>              | This study  |
| TOY60  | <i>hmra::Kl-ura3-Δ32 sgs1Δ::KANMX6 mph1::TRP1 sir3Δ::HPHMX</i>                | This study  |
| TOY61  | <i>hmra::Kl-ura3-Δ32 ura3-52Δ::Kl-ura3-KANMX msh6Δ::TRP1 sir3Δ::HPHMX</i>     | This study  |
| TOY62  | <i>hmra::Kl-ura3-Δ32 rdh54Δ::KANMX6 sir3Δ::HPHMX</i>                          | This study  |



|       |                                                                                          |            |
|-------|------------------------------------------------------------------------------------------|------------|
| TOY64 | <i>hmra::Kl-ura3-Δ32 ura3-52Δ::Kl-ura3-KANMX6 rdh54Δ::TRP1 sir3Δ::HPHMX</i>              | This study |
| TOY67 | <i>hmra::Kl-ura3-Δ32 rad54Δ::KANMX6 sir3Δ::HPHMX</i>                                     | This study |
| TOY68 | <i>hmra::Kl-ura3-Δ32 rdh54Δ::KANMX chk1Δ::TRP1 sir3Δ::HPHMX</i>                          | This study |
| TOY72 | <i>hmra::Kl-ura3-Δ32 rad1Δ::KANMX sir3Δ::HPHMX</i>                                       | This study |
| TOY74 | <i>hmra::Kl-ura3-Δ32 ura3-52Δ::NATMX thr4Δ::Kl-ura3-TRP1 sir3Δ::HPHMX</i>                | This study |
| TOY77 | <i>hmra::Kl-ura3-Δ32 ura3-52Δ::NATMX thr4Δ::Kl-ura3-TRP1 rdh54Δ::KANMX6 sir3Δ::HPHMX</i> | This study |
| TOY79 | <i>hmra::Kl-ura3-Δ32 ura3-52Δ::NATMX thr4Δ::Sc-ura3-KANMX6 sir3Δ::HPHMX</i>              | This study |
| TOY83 | <i>hmra::Kl-ura3-Δ32 ura3-52Δ::NATMX thr4Δ::Sc-ura3-KANMX6 rdh54Δ::TRP1 sir3Δ::HPHMX</i> | This study |
| TOY84 | <i>hmra::Kl-ura3-Δ32 msh6Δ::KANMX6 mph1Δ::TRP1 sir3Δ::HPHMX</i>                          | This study |
| TOY85 | <i>hmra::Kl-ura3-Δ32 rad59Δ::TRP1 sir3Δ::HPHMX</i>                                       | This study |
| TOY86 | <i>hmra::Kl-ura3-Δ32 rad1Δ::KANMX msh6Δ::TRP1 sir3Δ::HPHMX</i>                           | This study |
| TOY88 | <i>hmra::Kl-ura3-Δ32 dmc1Δ::KANMX6 sir3Δ::HPHMX</i>                                      | This study |
| TOY89 | <i>hmra::Kl-ura3-Δ32 uls1Δ::KANMX6 sir3Δ::HPHMX</i>                                      | This study |
| TOY90 | <i>hmra::Kl-ura3-Δ32 rad59Δ::TRP1 ura3-52Δ::Kl-ura3-KANMX sir3Δ::HPHMX</i>               | This study |
| TOY91 | <i>hmra::Kl-ura3-Δ32 rad59Δ::TRP1 rdh54Δ::NATMX ura3-52Δ::Kl-ura3-KANMX sir3Δ::HPHMX</i> | This study |

Table S6, related to Experimental Procedures. Primers used in this study\*

| Name             | 5' → 3' sequence                                                                         | Comments                                                              |
|------------------|------------------------------------------------------------------------------------------|-----------------------------------------------------------------------|
| <b>KlURA3p1</b>  | ATGTCCACAAAATCATATACCAGTAGAGCTG                                                          |                                                                       |
| <b>MATdist2R</b> | AGGCACCCAAGAAGGCGAATAAGA                                                                 |                                                                       |
| <b>MATDp8</b>    | CGCATGGGCAGTTTACCTTT                                                                     |                                                                       |
| <b>MATX F</b>    | CTTTTCTTCTTCTATTTCGAAACCCA                                                               |                                                                       |
| <b>MATXp1</b>    | TGTTACACTCTCTGGTAACTTAGG                                                                 |                                                                       |
| <b>Slx1p1</b>    | CCGACTAGATCGTCATATGAG                                                                    |                                                                       |
| <b>Slx1R2</b>    | CGAGAATTTGACAGGCATTCA                                                                    |                                                                       |
| <b>OT09</b>      | GCATTACGAAGATTCTCGAT                                                                     |                                                                       |
| <b>OT10</b>      | CTATGTTGATCATAAGTCTCTTC                                                                  |                                                                       |
| <b>OT12</b>      | <b>GATTATTGATGCTTGCGTGAATATACTAAGGGTACCGTTG</b>                                          |                                                                       |
| <b>OT13</b>      | <b>GTACCCTTAGTATATTCACGCAAGCATCAATAATCCCCTTG</b>                                         |                                                                       |
| <b>OT18</b>      | <b>TTTACATTTAGCAATATATATATATATATTTCAAGGATATACCATTCTAATGTCTGCCCTATGTCCACAAAATCATATAC</b>  |                                                                       |
| <b>OT19</b>      | <b>CGGCGGGGACGAGGCAAGCTAAACAGATCTGGCGGCCTTAATTAACCCGGGGATCCGCTTAAATGGGGAGCGCTGATTC</b>   |                                                                       |
| <b>OT20</b>      | <b>GACGGATCCCCGGGTTAATTAAGGCGCGCCAGATCTGTTAGCTTGCCCTCGTCCCCGCCG</b>                      | used with OT18 and OT19 to create pRS314- <i>pLEU2-Kl-URA3-KanMX6</i> |
| <b>OT21</b>      | <b>TCTATTATGAATTTCAATTTATAAAGTTTATGTACAAATATCATAAAAAAAGAGAATCTTTGCCGATTCATTAATGCAGGT</b> |                                                                       |
| <b>OT22</b>      | <b>CGGGGCTGGCTTAACTATGCGGCATCAGAGCAGATTGTACTGAGAGTGCACCATAAACGA</b>                      | used with OT18 and OT19 to create pRS314- <i>pLEU2-Kl-URA3-TRP1</i>   |
| <b>OT23</b>      | <b>TCTATTATGAATTTCAATTTATAAAGTTTATGTACAAATATCATAAAAAAAGAGAATCTTTCTATTTCTTAGCATTTTGA</b>  |                                                                       |
| <b>OT28</b>      | <b>TTTACATTTAGCAATATATATATATATATTTCAAGGATATACCATTCTAATGTCTGCCCTATGTGCGAAAGCTACATATAA</b> | used with OT20 and OT21 to create pRS314- <i>pLEU2-Sc-URA3-KanMX6</i> |
| <b>OT29</b>      | <b>CGGCGGGGACGAGGCAAGCTAAACAGATCTGGCGGCCTTAATTAACCCGGGGATCCGCTTAGTTTGGCTGGCCGCATC</b>    |                                                                       |
| <b>OT31</b>      | <b>TTAAATGAAGCTCTAATTTGTGAGTTTAGTATACATGCATTTACTTATAATACAGTTTTGAATTCGAGCTCGTTTAAAC</b>   |                                                                       |
| <b>OT40</b>      | <b>TGCGAGGCATATTTATGGTGAAGGATAAGTTTTGACCATCAAAGAAGGTTAATGTGGCTGCAGTAGAGCTGAGACTCATG</b>  | to delete <i>ura3-52</i> and its promoter with <i>Kl-ura3-KanMX6</i>  |

|             |                                                                                        |                                                  |
|-------------|----------------------------------------------------------------------------------------|--------------------------------------------------|
| <b>OT51</b> | <b>TTATAATTCATTTTAGCAAGTTCTTCTTCAATAGCGTTTTTGACCAATTCAACGTCAGCGAATTCGAGCTCGTTTAAAC</b> | to delete <i>THR4</i> with <i>Sc-ura3-KanMX6</i> |
| <b>OT55</b> | <b>GTTCTTAGACGGCCACCATCCCTCACACCAATGCCAAGCTTCCCAAGTTTACAGATCTCAGTAGAGCTGAGACTCATG</b>  | to delete <i>THR4</i> with <i>Kl-ura3-TRP1</i>   |
| <b>OT70</b> | GAATTGTCTTCCAAGGGTCTCTAG                                                               |                                                  |
| <b>OT71</b> | CTAGAGAACCCTTGGAAGACAATTC                                                              |                                                  |
| <b>OT79</b> | <b>TTATAATTCATTTTAGCAAGTTCTTCTTCAATAGCGTTTTTGACCAATTCAACGTCAGCCTATTCTTAGCATTTTGA</b>   |                                                  |
| <b>OT88</b> | CGCCAAGGGTAGAGATCCTAAG                                                                 |                                                  |
| <b>OT90</b> | <b>GTTCTTAGACGGCCACCATCCCTCACACCAATGCCAAGCTTCCCAAGTTTACAGATCTGGAACGTGCTGCTACTCATC</b>  |                                                  |

\* Primer sequences for other gene deletions are available upon request. All gene disruptions/alteration were confirmed by PCR
